# Supplementary material for: Impact of Cu doping on the structural, morphological and optical activity of V2O5 nanorods for photodiode fabrication and their characteristics
Source: Royal Society of Chemistry journal article supplement (doi:10.1039/c8ra07717g), 2019-01-01
Supplement: c8ra07717g1.pdf [file c8ra07717g1.pdf]

## ELECTRONIC SUPPLEMENTARY INFORMATION

### Impact of Cu doping on the structural, morphological and optical activity of $V_2O_5$ nanorods for photodiode fabrication and its characteristics

R. Thangarasu<sup>a</sup>, B. Babu<sup>b</sup>, N. Senthil Kumar<sup>c</sup>, Mon-Shu Ho<sup>b</sup>, O.N. Balasundaram<sup>a,\*</sup>,  
T. Elangovan<sup>d</sup>

<sup>a</sup> Department of Physics, PSG College of Arts & Science, Coimbatore-641 014, Tamil Nadu, India

<sup>b</sup> Department of Physics, National Chung Hsing University, Taichung City-402, Taiwan

<sup>c</sup> Nanotechnology Research Lab, Department of Physics, Kongunadu Arts and Science College, G-N Mills, Coimbatore-641 029, Tamil Nadu, India

<sup>d</sup> Department of Energy Studies, Periyar University, Salem-636 011, Tamil Nadu, India

\*Corresponding Author: Ph: + 91 0422 430 3320, Fax: +91 04224303300

E-mail address: [nbalasundarm@gmail.com](mailto:nbalasundarm@gmail.com) (O.N. Balasundaram)

---

#### TG/DTA Studies

Thermo-gravimetric analysis/differential thermal analysis (TGA/DTA) was carried out using NETZSCH-STA, 449F3-JUPITER, at a heating rate of 10°C/min in  $N_2$  atmosphere. Fig. S1&S2 shows the TG-DTA curves are recorded at 10°C/min up to 1000°C for the thermal decomposition of pure and  $Cu_xV_2O_5$  ( $x=Cu$  7 at.%) samples in nitrogen atmosphere. In the figure, the TG curve of pure  $V_2O_5$  is exhibit well-defined weight loss step. The weight loss of 2.8% at  $R_T$  to 1000°C can be attributed to the release of water molecules adsorbed on the surface of the studied sample for below temperature up to 200°C. It is characterized by a broad endothermic DTA peak at 678°C suggests that the melting point for  $V_2O_5$  at 680°C [1]. From Fig. S2 illustrates the TG-DTA curve of  $Cu_xV_2O_5$  sample which is roughly three stages of thermal weightlessness corresponding to the physical or chemical reactions. In TGA, the continuous change in weight of a studied sample occur either due to desorption of fraction of volatile contents (weight loss) or absorption of gaseous components from the surrounding atmosphere (weight gain) as a function of temperature. In the figure, the first step up to ~220°C with a weight loss of 0.8 and 10.3% and an endothermic peak at 217.4°C is due to the dehydration of the absorbed water molecules on the surfaces. The second step between 220°C and 400°C, with a weight loss of 4.7 and 6.0% and an endothermic peak at 324.1°C and exothermic peak at 393°C which is attributed to the decomposition of the trace absorbed organic molecules in the material. The third step beyond 800°C, with a weight loss of 1.7% and an endothermic peak at 716.2°C. The strong endothermic peak shifted from 678°C to

716.2°C upward and the peak became sharper, which was beneficial for doping of Cu in  $V_2O_5$  crystal lattice.

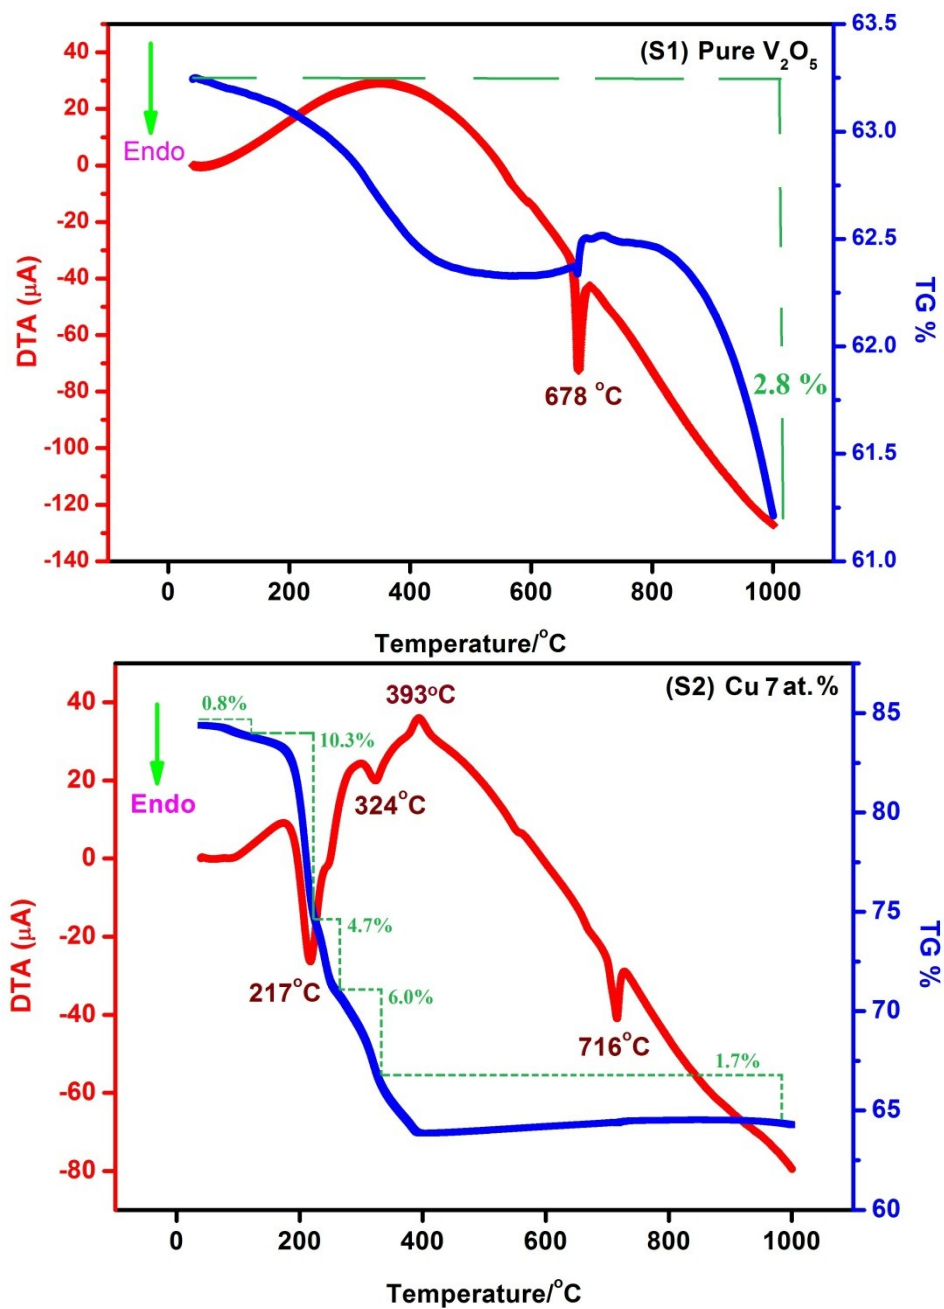

**Fig. (S1)** TG/DTA spectrum of Pure and **(S2)** Cu 7 at.% doped  $V_2O_5$ .

### Reference

[1] Pavasupree, Y. Suzuki, A. Kitiyanan, S. Art, S. Yoshikawa, *J. Solid State Chem.*, 2005, **178**, 2152.
